# Supplementary material
Source: Research Square preprint supplement (doi:10.21203/rs.3.rs-9457970/v1)
Supplement: Supplementary file 1 [file c9b1ae292d81d606ed7611ba.docx]

Supplementary Material 1

**Table of Contents**

**Supplementary Tables**

- **Supplementary Table 1.** Fully Adjusted (Model 3) Associations Between Standardized GIHI and Clinical Outcomes in Diabetic Patients
  - **Table 1A.** 30-day MACE
  - **Table 1B.** 30-day Stroke
  - **Table 1C.** 30-day MI
  - **Table 1D.** 30-day Revascularization
  - **Table 1E.** 30-day Mortality
  - **Table 1F.** Long-term Mortality
- **Supplementary Table 2.** Fully Adjusted (Model 3) Associations Between Standardized GIHI and Clinical Outcomes in Non-Diabetic Patients
  - **Table 2A.** 30-day MACE
  - **Table 2B.** 30-day Stroke
  - **Table 2C.** 30-day MI
  - **Table 2D.** 30-day Revascularization
  - **Table 2E.** 30-day Mortality
  - **Table 2F.** Long-term Mortality

**Supplementary Table 1A. Model 3 for 30-day MACE in Diabetic Patients**

| **Variable** | **HR (95% CI)** | **P value** |
| --- | --- | --- |
| GIHI (standardized) | 1.45 (1.28–1.65) | <0.001 |
| Age | 1.01 (1.00–1.03) | 0.134 |
| Gender | 1.59 (1.21–2.10) | 0.001 |
| Euroscore II | 1.04 (0.98–1.10) | 0.170 |
| WBC | 1.02 (0.98–1.06) | 0.276 |
| Total protein | 0.82 (0.69–0.99) | 0.034 |
| Creatinine | 1.09 (0.97–1.22) | 0.156 |
| Radial artery use | 1.11 (0.43–1.23) | 0.235 |
| Septum thickness | 1.06 (1.00–1.12) | 0.033 |
| Bypass time | 1.00 (0.99–1.01) | 0.166 |
| LVEF | 0.99 (0.97–1.00) | 0.066 |

**Supplementary Table 1B. Model 3 for 30-day Stroke in Diabetic Patients**

| **Variable** | **HR (95% CI)** | **P value** |
| --- | --- | --- |
| GIHI | 0.91 (0.66–1.27) | 0.592 |
| Age | 1.03 (1.00–1.06) | 0.036 |
| Gender | 1.73 (1.03–2.90) | 0.037 |
| Euroscore II | 1.01 (0.89–1.14) | 0.887 |
| WBC | 1.05 (0.99–1.11) | 0.142 |
| Total protein | 0.90 (0.63–1.27) | 0.542 |
| Creatinine | 0.90 (0.61–1.33) | 0.607 |
| Radial | 1.12 (0.52–2.42) | 0.768 |
| Septum | 1.03 (0.93–1.14) | 0.520 |
| Bypass | 1.01 (1.00–1.01) | 0.042 |
| LVEF | 0.98 (0.95–1.00) | 0.062 |

**Supplementary Table 1C. Model 3 for 30-day MI in Diabetic Patients**

| **Variable** | **HR (95% CI)** | **P value** |
| --- | --- | --- |
| GIHI | 1.27 (1.00–1.60) | 0.049 |
| Age | 1.00 (0.98–1.03) | 0.704 |
| Gender | 2.63 (1.70–4.08) | <0.001 |
| Euroscore II | 0.96 (0.85–1.08) | 0.502 |
| WBC | 0.96 (0.89–1.03) | 0.243 |
| Total protein | 0.92 (0.70–1.22) | 0.562 |
| Creatinine | 0.99 (0.73–1.33) | 0.923 |
| Radial | 0.40 (0.17–0.93) | 0.032 |
| Septum | 1.05 (0.96–1.15) | 0.280 |
| Bypass | 1.00 (0.99–1.00) | 0.397 |
| LVEF | 1.01 (0.98–1.03) | 0.505 |

**Supplementary Table 1D. Model 3 for 30-day Revascularization (Diabetic)**

| **Variable** | **HR (95% CI)** | **P value** |
| --- | --- | --- |
| GIHI | 0.97 (0.59–1.59) | 0.905 |
| Age | 0.98 (0.93–1.04) | 0.567 |
| Gender | 0.14 (0.02–1.06) | 0.057 |
| Euroscore II | 1.12 (0.92–1.36) | 0.249 |
| WBC | 1.02 (0.90–1.15) | 0.780 |
| Total protein | 0.74 (0.42–1.32) | 0.313 |
| Creatinine | 1.04 (0.65–1.64) | 0.877 |
| Radial | — | — |
| Septum | 1.13 (0.95–1.36) | 0.171 |
| Bypass | 0.99 (0.98–1.01) | 0.350 |
| LVEF | 0.99 (0.95–1.04) | 0.784 |

**Supplementary Table 1E. Model 3 for 30-day Mortality (Diabetic)**

| **Variable** | **HR (95% CI)** | **P value** |
| --- | --- | --- |
| GIHI | 2.56 (2.06–3.18) | <0.001 |
| Age | 1.01 (0.98–1.05) | 0.469 |
| Gender | 1.38 (0.76–2.48) | 0.287 |
| Euroscore II | 1.05 (0.96–1.14) | 0.283 |
| WBC | 0.99 (0.93–1.04) | 0.645 |
| Total protein | 0.64 (0.46–0.90) | 0.009 |
| Creatinine | 1.13 (0.97–1.33) | 0.125 |
| Radial | 0.32 (0.04–2.38) | 0.266 |
| Septum | 1.10 (0.97–1.25) | 0.154 |
| Bypass | 1.01 (1.00–1.02) | 0.006 |
| LVEF | 0.97 (0.95–1.00) | 0.020 |

**Supplementary Table 1F. Model 3 for Long-term Mortality (Diabetic)**

| **Variable** | **HR (95% CI)** | **P value** |
| --- | --- | --- |
| GIHI | 2.57 (2.33–2.83) | <0.001 |
| Age | 1.03 (1.01–1.04) | 0.001 |
| Gender | 0.75 (0.56–1.01) | 0.055 |
| Euroscore II | 1.11 (1.06–1.15) | <0.001 |
| WBC | 1.00 (0.96–1.04) | 0.936 |
| Total protein | 0.66 (0.56–0.77) | <0.001 |
| Creatinine | 1.15 (1.05–1.26) | 0.003 |
| Radial | 0.20 (0.07–0.53) | 0.001 |
| Septum | 1.09 (1.03–1.16) | 0.002 |
| Bypass | 1.00 (1.00–1.01) | 0.024 |
| LVEF | 0.98 (0.97–1.00) | 0.007 |

**Supplementary Table 2A. 30-day MACE**

| Variable | HR (95% CI) | P value |
| --- | --- | --- |
| GIHI | 1.03 (0.92–1.16) | 0.596 |
| Age | 1.00 (0.99–1.02) | 0.841 |
| Euroscore II | 1.08 (1.03–1.14) | 0.002 |
| COPD | 1.80 (1.22–2.66) | 0.003 |
| Total protein | 0.89 (0.75–1.06) | 0.186 |
| Creatinine | 1.26 (1.14–1.40) | <0.001 |
| Grafts ≥3 | 0.79 (0.61–1.02) | 0.074 |
| Bypass | 1.00 (1.00–1.01) | 0.012 |
| Septum | 1.05 (1.00–1.11) | 0.043 |
| LVEF | 0.99 (0.98–1.01) | 0.326 |

**Supplementary Table 2B. 30-day Stroke**

| Variable | HR (95% CI) | P value |
| --- | --- | --- |
| GIHI | 0.98 (0.78–1.24) | 0.887 |
| Age | 0.99 (0.97–1.02) | 0.553 |
| Euroscore II | 1.11 (1.00–1.23) | 0.048 |
| COPD | 4.13 (2.28–7.47) | <0.001 |
| Total protein | 0.94 (0.67–1.34) | 0.747 |
| Creatinine | 1.00 (0.70–1.42) | 0.997 |
| Grafts ≥3 | 0.98 (0.59–1.62) | 0.934 |
| Bypass time | 1.00 (0.99–1.01) | 0.546 |
| Septum | 1.15 (1.05–1.27) | 0.004 |
| LVEF | 0.99 (0.96–1.01) | 0.336 |

**Supplementary Table 2C. 30-day MI**

| Variable | HR (95% CI) | P value |
| --- | --- | --- |
| GIHI | 0.99 (0.83–1.19) | 0.957 |
| Age | 1.00 (0.98–1.02) | 0.764 |
| Euroscore II | 0.94 (0.85–1.05) | 0.262 |
| COPD | 1.51 (0.80–2.87) | 0.202 |
| Total protein | 0.96 (0.74–1.25) | 0.758 |
| Creatinine | 0.99 (0.71–1.36) | 0.927 |
| Grafts ≥3 | 0.51 (0.34–0.77) | 0.001 |
| Bypass time | 1.01 (1.00–1.01) | 0.047 |
| Septum | 0.98 (0.91–1.06) | 0.688 |
| LVEF | 0.99 (0.97–1.01) | 0.233 |

**Supplementary Table 2D. 30-day Revascularization**

| Variable | HR (95% CI) | P value |
| --- | --- | --- |
| GIHI | 0.88 (0.66–1.18) | 0.402 |
| Age | 1.01 (0.98–1.05) | 0.394 |
| Euroscore II | 0.94 (0.81–1.10) | 0.447 |
| COPD | 0.35 (0.05–2.55) | 0.299 |
| Total protein | 1.12 (0.74–1.70) | 0.579 |
| Creatinine | 1.30 (1.04–1.62) | 0.019 |
| Grafts ≥3 | 1.07 (0.59–1.95) | 0.818 |
| Bypass time | 1.01 (1.00–1.01) | 0.147 |
| Septum | 1.00 (0.89–1.13) | 0.975 |
| LVEF | 1.01 (1.00–1.01) | 0.163 |

**Supplementary Table 2E. 30-day Mortality**

| Variable | HR (95% CI) | P value |
| --- | --- | --- |
| GIHI | 1.37 (1.06–1.77) | 0.016 |
| Age | 1.03 (0.99–1.08) | 0.186 |
| Euroscore II | 1.18 (1.10–1.28) | <0.001 |
| COPD | 1.96 (0.65–5.90) | 0.233 |
| Total protein | 0.56 (0.34–0.91) | 0.020 |
| Creatinine | 1.64 (1.43–1.88) | <0.001 |
| Grafts ≥3 | 0.77 (0.37–1.59) | 0.479 |
| Bypass time | 1.01 (1.00–1.02) | 0.167 |
| Septum | 1.09 (0.94–1.26) | 0.252 |
| LVEF | 0.97 (0.94–1.01) | 0.098 |

**Supplementary Table 2F. Long-term Mortality**

| Variable | HR (95% CI) | P value |
| --- | --- | --- |
| GIHI | 2.00 (1.85–2.16) | <0.001 |
| Age | 1.05 (1.04–1.06) | <0.001 |
| Euroscore II | 1.04 (1.00–1.08) | 0.039 |
| COPD | 0.80 (0.46–1.41) | 0.445 |
| Total protein | 0.73 (0.63–0.85) | <0.001 |
| Creatinine | 1.51 (1.39–1.63) | <0.001 |
| Grafts ≥3 | 1.31 (1.04–1.64) | 0.021 |
| Bypass time | 1.00 (1.00–1.01) | 0.132 |
| Septum | 1.18 (1.13–1.24) | <0.001 |
| LVEF | 0.99 (0.97–1.00) | 0.012 |
